# Supplementary material
Source: publisher figshare collection journal article supplement (https://acs.figshare.com/ndownloader/files/4697944)
Supplement: Supplementary file 1 [file 4697944]

# **Infrared Spectroscopy Characterization of the Chemistry of C<sub>4</sub> Hydrocarbons on Pt(111)**

## **Single-Crystal Surfaces**

Ilkeun Lee and Francisco Zaera\*

Department of Chemistry, University of California, Riverside, CA 92521, USA

### **Supporting Information**

Figure 1. RAIRS for the uptake of cis- and trans-2-butene on Pt(111) at 80 K.

Figure 2. RAIRS for the uptake of butane, 1-butene, and 1,3-butadiene on Pt(111) at 80 K.

Figure 3. RAIRS for the thermal chemistry of cis- and trans-2-butene on Pt(111).

Figure 4. RAIRS for the thermal chemistry of 1-butene and 1,3-butadiene on Pt(111).

Table 1. Peak assignment for the RAIRS of cis-2-, trans-2-, and 1-butenes adsorbed on Pt(111).

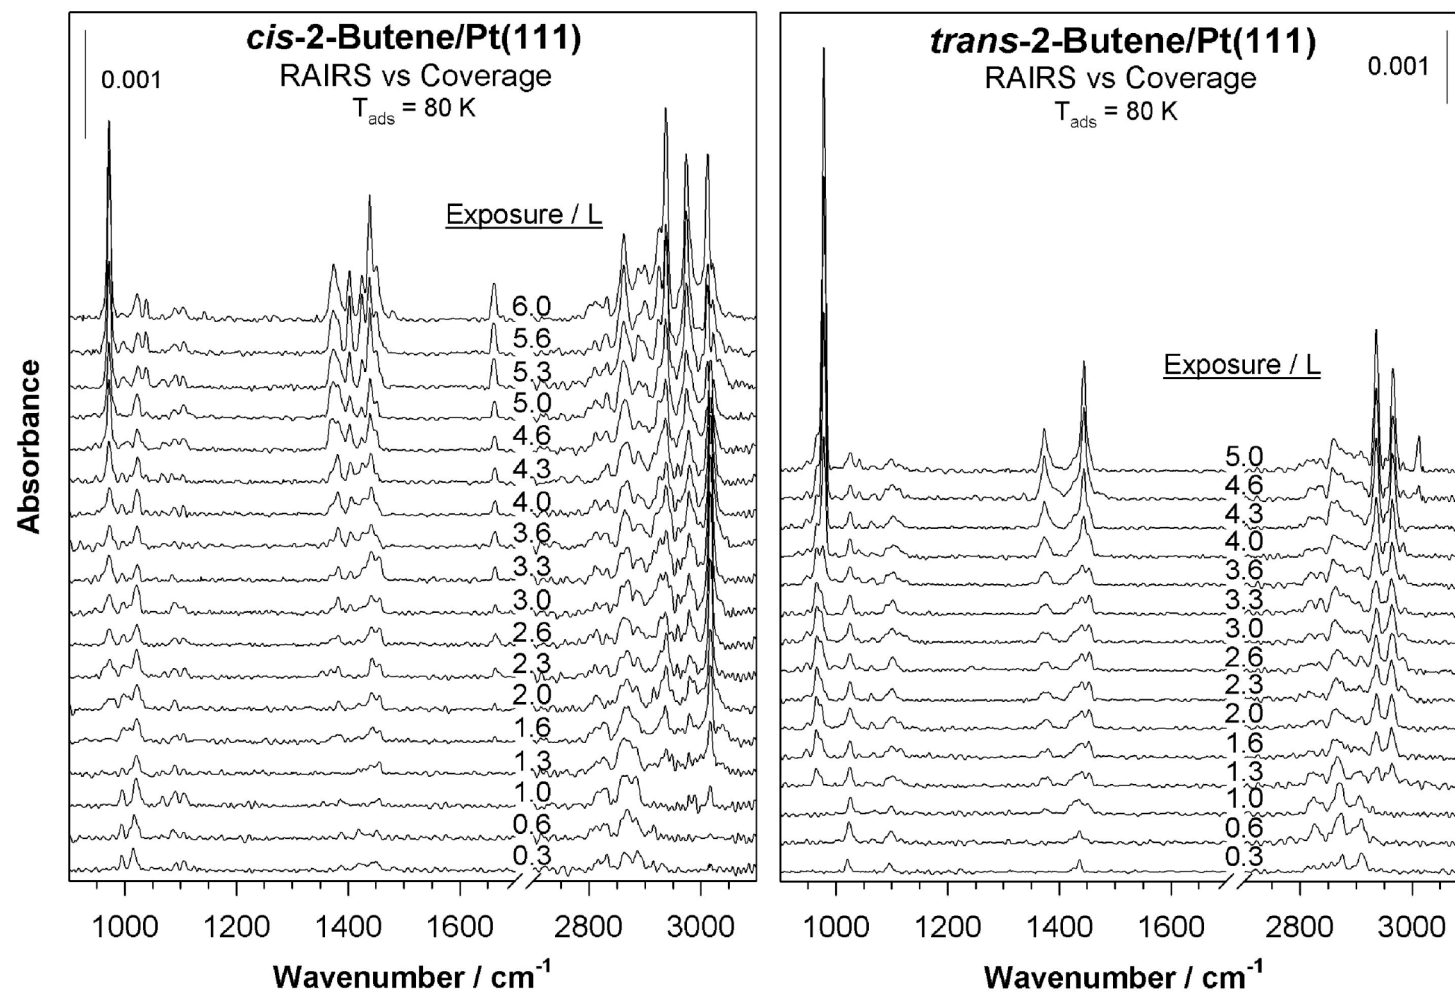

Figure 1. Reflection-absorption infrared spectroscopy (RAIRS) traces for the uptake of *cis*-2-butene (left) and *trans*-2-butene (right) on Pt(111) at 80 K. A clear change is seen in both cases at exposures around 1 L, signifying the transition from di-σ to π bonding commonly seen during the adsorption of alkenes on transition metals.

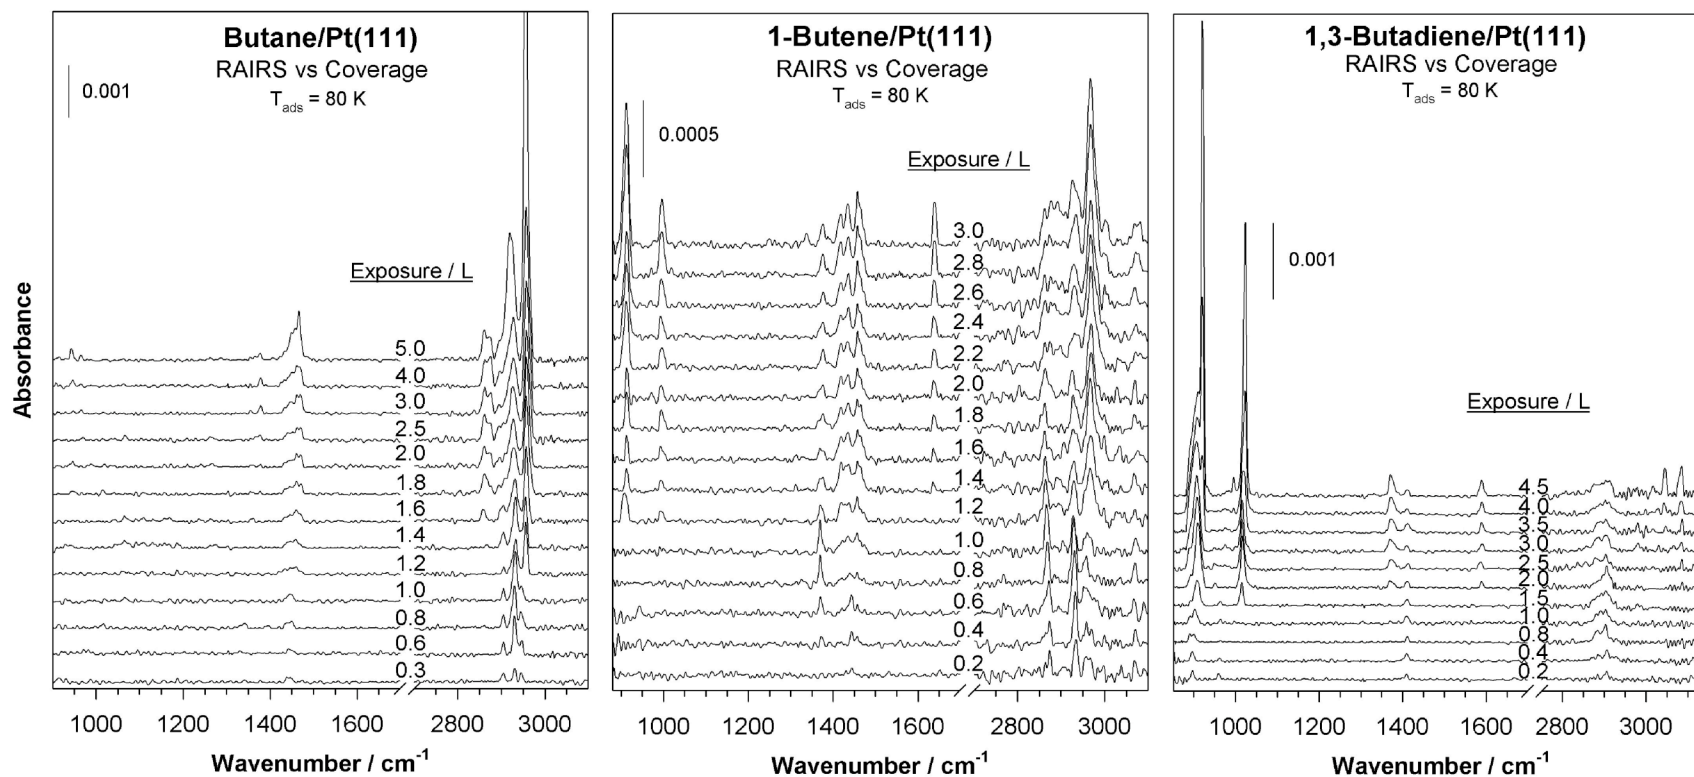

Figure 2. RAIRS traces for the uptake of butane (left), 1-butene (center), and 1,3-butadiene (right) on Pt(111) at 80 K. Definite adsorption geometries are identified in all these cases for the adsorbed monolayer by the relative intensities of the bands due to vibrational modes of different symmetries.

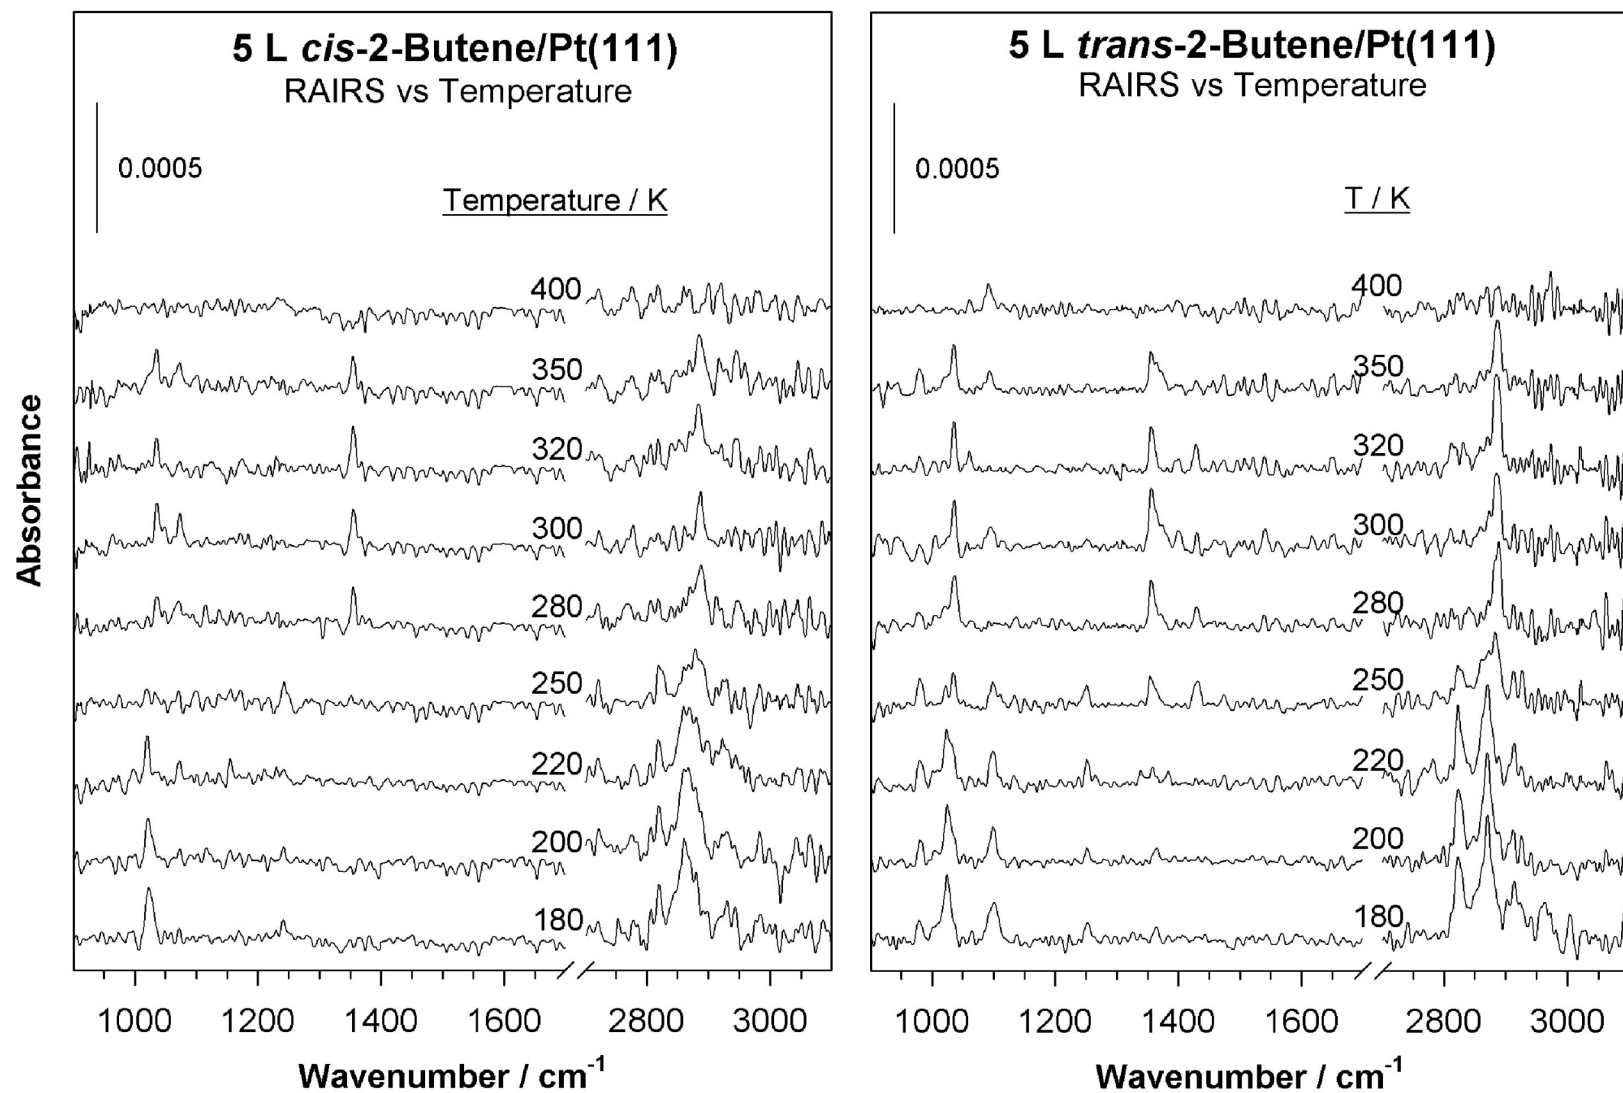

Figure 3. RAIRS traces from 5.0 L of *cis*-2-butene (left) and *trans*-2-butene (right) on Pt(111) as a function of annealing temperature.

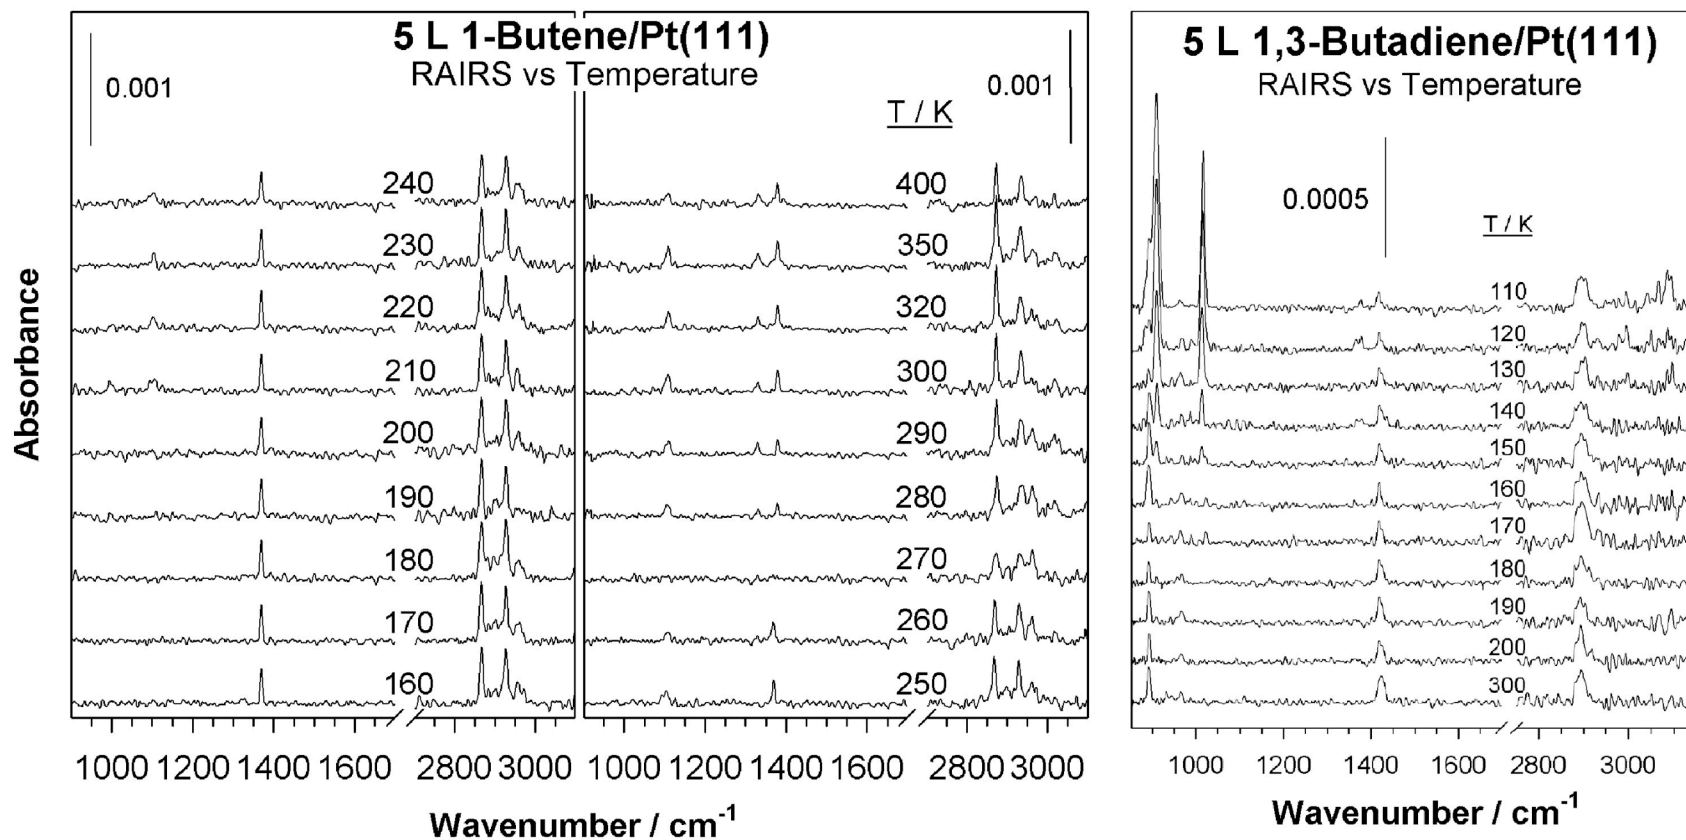

Figure 4. RAIRS traces from 5.0 L of 1-butene (left) and 1,3-butadiene on Pt(111) as a function of annealing temperature.

Table 1. Vibrational assignment of the features seen in the RAIRS spectra of cis-2-, trans-2-, and 1-butenes adsorbed on Pt(111) at 80 K. Two coverage regimes are reported, one for exposures below 1.0 L, which corresponds to di- $\sigma$  bonding, and another at close to monolayer saturation, where  $\pi$  surface species form on the surface.<sup>a</sup>

| Mode <sup>b</sup>                          | cis-2-Butene <sup>1-4</sup> |                      | trans-2-Butene <sup>1-5</sup> |                      | 1-Butene <sup>3,5,6</sup> |               |
|--------------------------------------------|-----------------------------|----------------------|-------------------------------|----------------------|---------------------------|---------------|
|                                            | Low Coverage                | High Coverage        | Low Coverage                  | High Coverage        | Low Coverage              | High Coverage |
| $\omega(=\text{CH}_2)_{\text{oop}}$        |                             |                      |                               |                      |                           | 913 (vs)      |
| $\omega(\text{C-H})_{\text{oop}}$          |                             | 972 (vs)             |                               | 966 (sh), 976 (vs)   |                           | 995 (m)       |
| $\rho(\text{CH}_3)$                        | 995 (m), 1016 (m)           | 1022 (w), 1039 (m)   | 1022 (m)                      | 1026 (m), 1041 (w)   |                           |               |
| $\nu(\text{C-C})$                          | 1093 (w), 1106 (w)          | 1090 (w), 1104 (w)   | 1097 (m)                      | 1068 (w), 1099 (w)   |                           |               |
| $\delta_s(\text{CH}_3)$                    | 1372 (m)                    | 1374 (s)             |                               | 1373 (m)             | 1369 (s)                  | 1376 (m)      |
| $\delta(\text{C-H})_{\text{ip}}$           | 1405 (m), 1425 (w)          | 1403 (s), 1425 (w)   |                               |                      |                           | 1418 (m)      |
| $\gamma(=\text{CH}_2)$                     |                             |                      |                               |                      | 1444 (m)                  | 1436 (m)      |
| $\delta_{\text{as}}(\text{CH}_3)$          | 1442 (m) 1454 (m)           | 1439 (vs), 1450 (s)  | 1436 (m)                      | 1444 (s), 1453 (sh)  | 1457 (w)                  | 1458 (s)      |
| $\nu(\text{C=C})$                          |                             | 1661 (s)             |                               |                      |                           | 1639 (m)      |
| $\nu_s(\text{CH}_3)$                       | 2868 (m), 2884 (m)          | 2868 (s), 2888 (m)   | 2870 (m)                      | 2859 (m)             | 2872 (s)                  | 2874 (m)      |
| $\nu_{\text{as}}(\text{CH}_2)_{\text{et}}$ |                             |                      |                               |                      | 2931 (s)                  | 2930 (s)      |
| $\nu_{\text{as}}(\text{CH}_3)$             |                             | 2937 (vs), 2974 (vs) |                               | 2937 (vs), 2966 (vs) | 2958 (m)                  | 2967 (vs)     |
| $\nu(=\text{C-H})$                         | 2910 (w)                    | 2926 (sh)            | 2910 (m)                      |                      | 2958 (m)                  | 2967 (vs)     |
| $\nu(=\text{C-H})$                         |                             | 3011 (vs), 3021 (sh) | 3019 (m)                      | 3012 (s)             |                           |               |
| $\nu_{\text{as}}(=\text{CH}_2)$            |                             |                      |                               |                      | 3070 (m)                  | 3070 (w)      |

## Footnotes

<sup>a</sup> Frequencies in cm<sup>-1</sup>. Relative intensities in parenthesis: w = weak, m = medium, s = strong, vs = very strong, sh = shoulder.

<sup>b</sup>  $\nu$  = stretching,  $\delta$  = deformation,  $\gamma$  = scissoring,  $\rho$  = rocking,  $\omega$  = wagging; s = symmetric, as = asymmetric, ip = in plane, oop = out of plane, et = ethyl group.

## References

- (1) Manzanares I, C.; Blunt, V. M.; Peng, J. *J. Phys. Chem.* **1993**, *97*, 3994.
- (2) McKean, D. C.; Mackenzie, M. W.; Morrisson, A. R.; Lavalley, J. C.; Janin, A.; Fawcett, V.; Edwards, H. G. M. *Spectrochimica Acta, Part A: Molecular and Biomolecular Spectroscopy* **1985**, *41A*, 435.
- (3) Barnes, A. J.; Howells, J. D. R. *Journal of the Chemical Society, Faraday Transactions 2: Molecular and Chemical Physics* **1973**, *69*, 532.
- (4) Avery, N. R.; Sheppard, N. *Proc. R. Soc. London A* **1986**, *405*, 27.
- (5) Anson, C. E.; Sheppard, N.; Bender, B. R.; Norton, J. R. *J. Am. Chem. Soc.* **1999**, *121*, 529.
- (6) Durig, J. R.; Compton, D. A. C. *J. Phys. Chem.* **1980**, *84*, 773.
